# Supplementary material for: Relationship between Phylogeny and Immunity Suggests Older Caribbean Coral Lineages Are More Resistant to Disease
Source: PLoS One. 2014 Aug 18;9(8):e104787. doi: 10.1371/journal.pone.0104787 (PMC4136782; doi:10.1371/journal.pone.0104787)
Supplement: Table S1 — Mean values (± standard error) of six immune traits (prophenoloxidase, melanin, superoxide dismutase, peroxidase, catalase and percent inhibition of bacterial growth), the integrated immune measure (PC1) and disease parameters (number of diseases and prevalence) used in the phylogenetic signal analyses on 14 Caribbean corals at three taxonomic levels (species, genus and family). (XLSX) [file pone.0104787.s001.xlsx]

## Sheet: Species
		n	Prophenoloxidase		Melanin		Superoxide dismutase		Peroxidase		Catalase		% Inhibition of bacterial growth		Integrative measure (PC1)		No. diseases	Prevalence
Species	Lineage "age"		Mean	SE	Mean	SE	Mean	SE	Mean	SE	Mean	SE	Mean	SE	Mean	SE
Porites astreoides	old	10	2.01027	0.301852	3.31186	0.407713	60094.3	3043	1.20355	0.445356	1151.51	162.938	18.8995	3.67099	0.278057	0.152888	5	1.24
Porites porites	old	10	2.17877	0.5003	11.5272	1.43258	50497.6	3607.75	1.92156	0.394897	1258.22	205.823	55.0291	3.69618	-0.948922	0.208308	3	0.17
Siderastrea radians	old	10	0.34588	0.0731883	1.06145	0.225739	21595.4	1108.75	1.05651	0.439522	180.312	13.7207	79.5626	0.784595	-2.83969	0.0409472	5	2
Dendrogyra cylindrus	old	10	0.24645	0.0805311	0.59053	0.0695777	13623.5	2190.7	0.40017	0.0509163	706.926	83.4039	44.6063	5.40607	-2.0683	0.20542	1	1.79
Meandrina jacksoni	old	10	6.31542	1.78449	0.94633	0.10816	32350.7	4733.92	0.8497	0.216148	1059.12	175.605	19.6892	2.67201	-0.35796	0.267485	4	0.17
Meandrina meandrites	old	10	3.2054	1.77446	0.75447	0.213555	31020.5	1756.81	1.0324	0.388201	1081.36	134.188	32.3869	5.95062	-0.83349	0.205042	4	0.17
Montastraea cavernosa	modern	10	7.92423	1.77053	0.84085	0.11382	57787.9	3490.97	12.125	3.37202	1153.63	280.808	8.30963	2.52191	0.935753	0.0870778	8	4.65
Orbicella annularis	modern	10	2.37107	0.334401	0.67848	0.0953613	52069.7	1627.64	9.40874	0.97017	1149.65	61.2959	4.34469	2.06241	0.767358	0.151524	8	14.19
Orbicella franksi	modern	10	8.44543	2.08887	1.20822	0.129886	54447.6	2208.28	5.87671	1.49701	620.109	194.662	8.19364	1.71377	1.2744	0.137016	6	10.67
Orbicella faveolata	modern	10	3.15514	0.539257	1.09077	0.0895382	41544.2	1949.6	14.3002	3.9229	867.428	111.896	24.1122	4.46301	-0.538862	0.164073	8	19.56
Diploria labyrinthiformis	modern	10	8.24872	0.773786	1.61311	0.255436	59434.2	2858.16	6.672	1.62309	2101.68	124.651	30.9529	2.86785	1.28014	0.216977	7	6.83
Pseudodiploria strigosa	modern	10	1.55411	0.570869	1.91089	0.658927	54491.2	2757.11	11.0726	1.42942	2006.78	203.568	19.0906	3.27783	1.1832	0.163909	6	5.51
Mussa angulosa	modern	10	1.50762	0.271793	1.50747	0.174339	34432.7	3009.42	11.3985	1.37093	56.3617	5.93927	20.4358	10.1963	1.52387	0.350886	1	0
Mycethophyllia aliciae	modern	10	1.70413	0.160818	1.26494	0.282532	54064.4	4242.63	8.176	1.22118	1785.41	232.419	1.91055	1.27596	0.344455	0.25552	3	10.67

## Sheet: Genus
		n	Prophenoloxidase		Melanin		Superoxide dismutase		Peroxidase		Catalase		% Inhibition of bacterial growth		Integrative measure (PC1)		No. diseases	Prevalence
Genus	Lineage "age"		Mean	SE	Mean	SE	Mean	SE	Mean	SE	Mean	SE	Mean	SE	Mean	SE
Dendrogyra	old	10	0.24645	0.0805311	0.59053	0.0695777	13623.5	2190.7	0.40017	0.0509163	706.926	83.4039	44.6063	5.40607	-2.0683	0.20542	1	1.79
Diploria	modern	10	8.24872	0.773786	1.61311	0.255436	59434.2	2858.16	6.672	1.62309	2101.68	124.651	30.9529	2.86785	1.28014	0.216977	7	6.83
Meandrina	old	20	4.76041	1.27562	0.8504	0.11856	31685.6	2462.09	0.94105	0.217248	1070.24	107.586	26.0381	3.49271	-0.595725	0.172854	4	0.17
Montastraea	modern	10	7.92423	1.77053	0.84085	0.11382	57787.9	3490.97	12.125	3.37202	1153.63	280.808	8.30963	2.52191	1.52387	0.350886	8	4.65
Orbicella	modern	30	4.65721	0.86255	0.99249	0.0727642	49353.8	1501.92	9.86189	1.52726	879.063	84.9578	12.2168	2.3085	0.682522	0.10976	8	14.81
Mussa	modern	10	1.50762	0.271793	1.50747	0.174339	34432.7	3009.42	11.3985	1.37093	56.3617	5.93927	20.4358	10.1963	-0.538862	0.164073	1	0
Mycetophyllia	modern	10	1.70413	0.160818	1.26494	0.282532	54064.4	4242.63	8.176	1.22118	1785.41	232.419	1.91055	1.27596	1.2744	0.137016	3	10.67
Porites	old	20	2.09452	0.285018	7.41953	1.1889	55295.9	2547.08	1.56255	0.301153	1204.86	128.34	36.9643	4.8583	-0.335432	0.188738	5	0.71
Pseudodiploria	old	10	1.55411	0.570869	1.91089	0.658927	54491.2	2757.11	11.0726	1.42942	2006.78	203.568	19.0906	3.27783	1.1832	0.163909	6	5.51
Siderastraea	old	10	0.34588	0.0731883	1.06145	0.225739	21595.4	1108.75	1.05651	0.439522	180.312	13.7207	79.5626	0.784595	-2.83969	0.0409472	5	2

## Sheet: Family
		n	Prophenoloxidase		Melanin		Superoxide dismutase		Peroxidase		Catalase		% Inhibition of bacterial growth		Integrative measure (PC1)		No. diseases	Prevalence
Family	Lineage "age"		Mean	SE	Mean	SE	Mean	SE	Mean	SE	Mean	SE	Mean	SE	Mean	SE
Poritidae (III)	old	20	2.09452	0.285018	7.41953	1.1889	55295.9	2547.08	1.56255	0.301153	1204.86	128.34	36.9643	4.8583	-0.335432	0.188738	5	0.71
Siderastreidae (IX)	old	10	0.34588	0.0731883	1.06145	0.225739	21595.4	1108.75	1.05651	0.439522	180.312	13.7207	79.5626	0.784595	-2.83969	0.0409472	5	0.98
Meandrinidae (XII)	old	30	3.25576	0.93142	0.763777	0.0846042	25664.9	2375.73	0.760757	0.152068	949.136	82.3814	32.2275	3.31566	-1.08658	0.184479	4	2
Montastreidae (XVI)	modern	10	7.92423	1.77053	0.84085	0.11382	57787.9	3490.97	12.125	3.37202	1153.63	280.808	8.30963	2.52191	1.52387	0.350886	8	4.65
Merulinidae (XVII)	modern	30	4.65721	0.86255	0.99249	0.0727642	49353.8	1501.92	9.86189	1.52726	879.063	84.9578	12.2168	2.3085	0.682522	0.10976	8	14.81
Mussidae (XXI)	modern	40	3.25365	0.522004	1.5741	0.191181	50605.6	2195.58	9.32977	0.751695	1487.56	155.725	18.0975	3.15699	0.79972	0.14918	7	5.75
